# Supplementary material for: Metabolomics reveals the impact of the saturation of dietary lipids on the aging and longevity of C. elegans
Source: Royal Society of Chemistry journal article supplement (doi:10.1039/d2mo00041e), 2022-03-30
Supplement: d2mo00041e1.pdf [file d2mo00041e1.pdf]

## **Metabolomics reveals the impact of saturation of dietary lipids on aging and longevity of *C. elegans***

Yanan Wang, Jiachen Shi, Fan Jiang, Yong-Jiang Xu\*, Yuanfa Liu

State Key Laboratory of Food Science and Technology, School of Food Science and Technology, National Engineering Research Center for Functional Food, National Engineering Laboratory for Cereal Fermentation Technology, Collaborative Innovation Center of Food Safety and Quality Control in Jiangsu Province, Jiangnan University, 1800 Lihu Road, Wuxi 214122, Jiangsu, People's Republic of China

\*Corresponding author: Yong-Jiang Xu, [yjxutju@gmail.com](mailto:yjxutju@gmail.com)

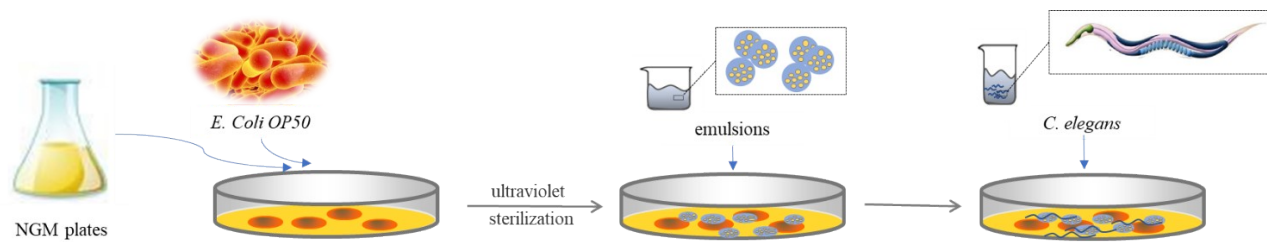

**Figure S1. The delivery method of emulsions for *Caenorhabditis elegans* (*C. elegans*).** One day prior to the experiment, test plates were coated with *E. coli OP50* solutions. The next day, the plates were treated with UV light to kill *E. coli OP50*, then 5mg different dietary oils were added onto each plate and 2-day-old synchronized worms (adult) were transferred to the test plates.

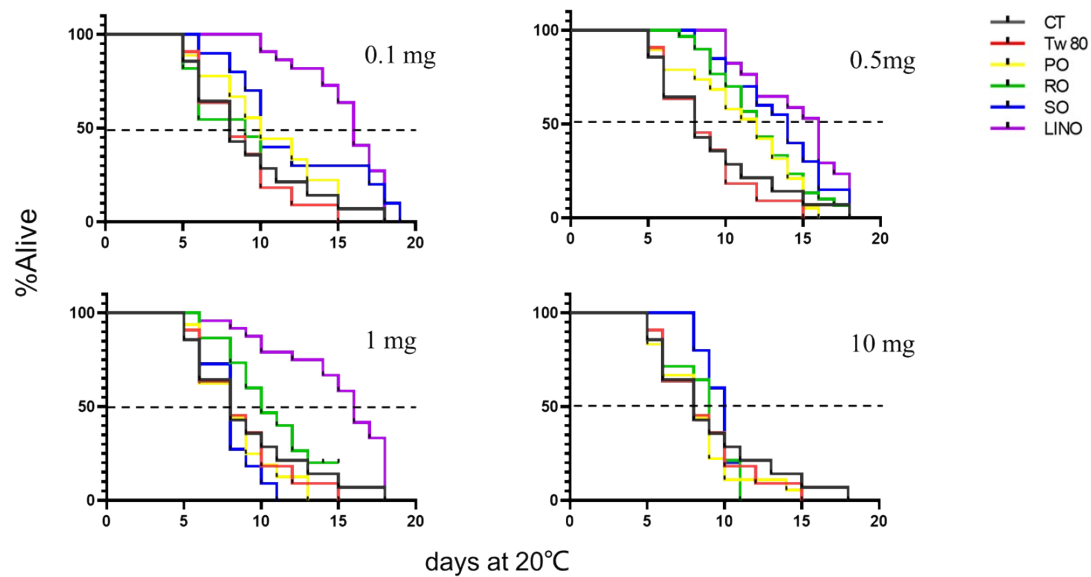

**Figure S2. Effects of different dietary oils (concentration at 0.1, 0.5, 1, 10 mg/plate) on lifespan of *C. elegans* at 20 °C.** *C. elegans* were synchronized before divided into different groups, all groups were treated with *E. coli* OP50, with or without 5mg different dietary oils (delivered by oil in water (O/W) emulsions using Tween 80 (Tw 80) as the emulsifier) in NGM plates containing 10  $\mu$ M 5-fluoro-2'-deoxyuracil (FUDR) and were stated at 20 °C. Each group had 3-5 biological replicates and each plate had at least 40 worms.

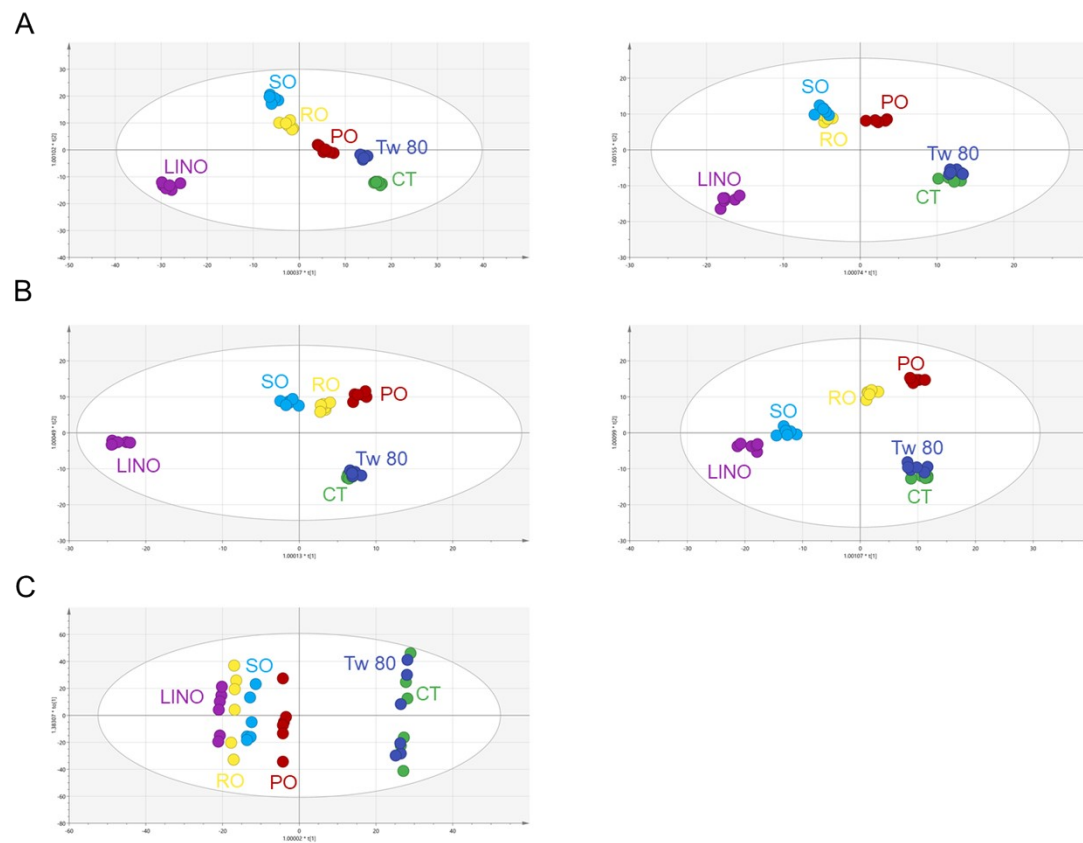

**Figure S3. Statistical analysis of metabolomic profiles in *C. elegans*.** (A) OPLS-DA scores of *C. elegans* samples detected by LC-MS using C18 positive and negative mode. (B) OPLS-DA

scores of *C. elegans* samples detected by LC-MS using HILIC positive and negative mode. (C) OPLS-DA scores of *C. elegans* samples detected by GC-MS.

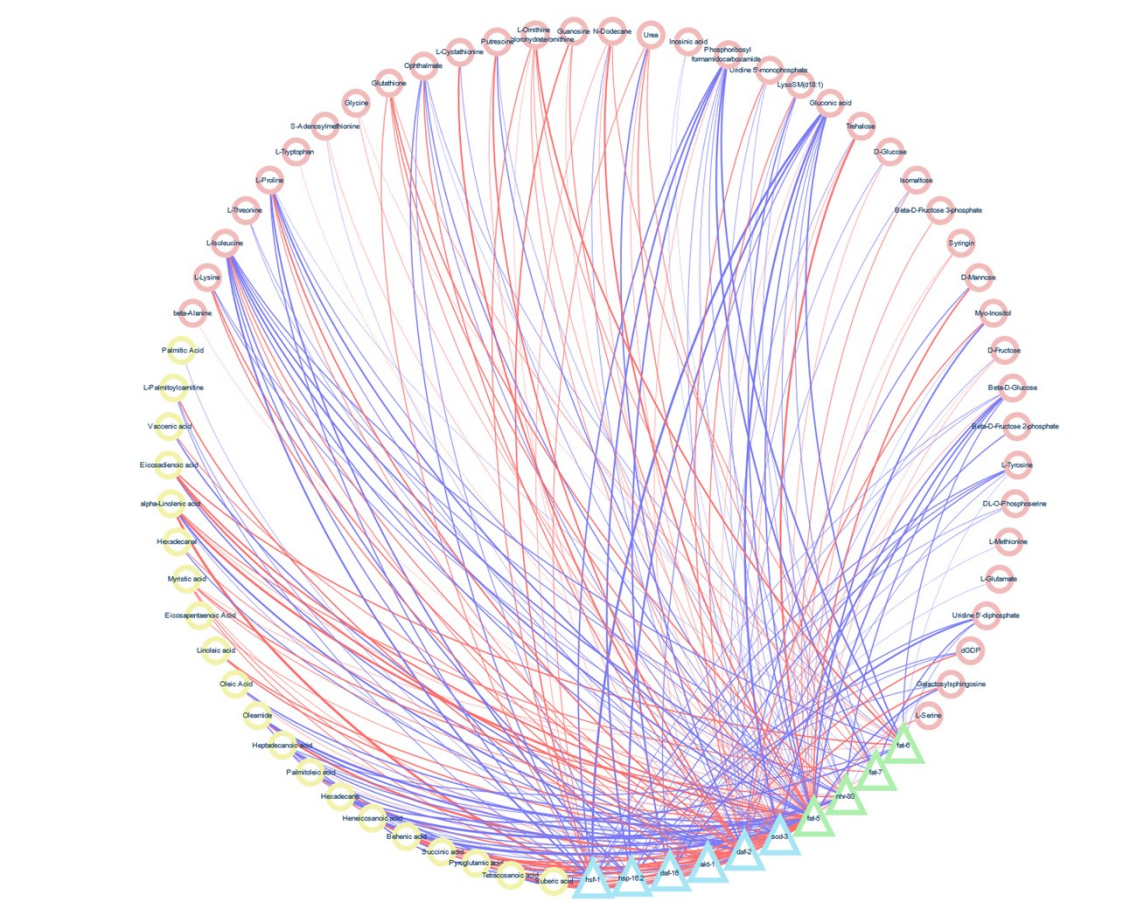

**Figure S4. Correlation analysis between differential metabolites and gene expressions.** Spearman bivariate correlate analysis was displayed between differential metabolites and gene expression levels altered by different dietary lipids ingestion. The bend lines portend a relation between metabolites and genes, the width means the strength of relevance. The color of lines states a positive (red) and a negative (blue) association. The circle shape delegate metabolites in IIS pathway (pink) and biosynthesis of USFAs metabolism pathway (yellow); the triangle shape represent genes in IIS pathway (blue) and biosynthesis of USFAs metabolism pathway (green).

**Table S1. The fatty acids composition of dietary oils**

| Dietary oil constitution (%) | constitution (%) |        |       |       |        |        |       |       |       |       |
|------------------------------|------------------|--------|-------|-------|--------|--------|-------|-------|-------|-------|
|                              | C14:0            | C16:0  | C16:1 | C18:0 | C18:1  | C18:2  | C18:3 | C20:0 | C22:1 | C20:4 |
| PO                           | 0.808            | 43.564 | /     | 4.128 | 42.867 | 8.313  | 0.32  | /     | /     | /     |
| RO                           | /                | 4.359  | 0.113 | 1.61  | 66.932 | 18.412 | 7.573 | 0.36  | 0.186 | 0.456 |
| SO                           | /                | 6.742  | /     | 2.421 | 25.213 | 65.296 | /     | /     | 0.328 | /     |
| LINO                         | /                | 6.56   | /     | 4.815 | 20.757 | 16.598 | 51.27 | /     | /     | /     |

**Table S2. Raw data of average lifespan of *C. elegans* treated with different dietary oils.**

| Group Name | Replicate 1 (days) | Replicate 2 (days) | Replicate 3 (days) |
|------------|--------------------|--------------------|--------------------|
| CT         | 16.00±3.63         | 16.31±3.59         | 15.56±3.87         |
| Tw 80      | 15.71±3.12         | 17.38±4.51         | 17.68±4.50         |
| PO         | 17.54±4.33         | 16.48±4.46         | 16.12±4.84         |
| RO         | 17.61±3.68         | 18.67±4.65         | 18.63±4.68         |
| SO         | 19.37±3.78         | 19.89±4.65         | 20.23±3.97         |
| LINO       | 20.96±4.79         | 19.43±5.39         | 20.41±4.94         |

**Table S3. Primer sequences**

| <b>Gene Name</b> | <b>Forward Primer (5' to 3')</b> | <b>Reverse Primer (5' to 3')</b> |
|------------------|----------------------------------|----------------------------------|
| <i>act-1</i>     | ACGAGGTTGCCGCTCTTGTTG            | ACGAGTCCTTCTGTCCCATAACCG         |
| <i>daf-2</i>     | CCACGACGACGAGCACATCAC            | GGCGGGTTTTCTCATAGCAGTC           |
| <i>akt-1</i>     | CGTTCTTGCCGGATACCTTCAC           | TCGGCTCGTCATTTCAGATTCTTCATC      |
| <i>daf-16</i>    | CGCCGCTACCATCTGACATCAC           | TCCGCCAAAAGAAGCCGAACG            |
| <i>hsf-1</i>     | AGGAGGACCATCTACATCATCTTCGG       | TTCTATTCACCTGAGCCATTTGCCTA<br>G  |
| <i>hsp-16.2</i>  | GATGTAGATGTTGGTGCAGTTGCTTC       | CTTCCTGAACCGCTTCTTTCTTTGG        |
| <i>sod-3</i>     | TCACTATTGCGGTTCAAGGCTCTG         | TTGCACAGGTGGCGATCTTCAAG          |
| <i>nhr-80</i>    | TTTGAAGTTTGCTAGGCGAGAGAGTG       | TAGACAACGAGAGAGTGTGGTGGAG        |
| <i>fat-5</i>     | GCCCTCTCCGTTACTGCTTCAC           | CTTCTCCGACTGCCGCAATAGATG         |
| <i>fat-6</i>     | TCGGAGAGGGAGGTCACAACCTTC         | CGGTCGTAGACAAGTCCAAGAGC          |
| <i>fat-7</i>     | ATCGTTGCCATCACAAGTGGACTG         | TTACGCACAAGAAGCCATCCCATG         |



**Table S4. Raw data of differential metabolites.** The original data of LC-MS and GC-MS were converted into mzData format before loading to MZmine 2.53 for baseline corrections, peak detection and data normalization. The vacant values were filled with half of the minimum value in each dataset.



**Table S5. Differential metabolites affect specific parameters of main metabolic pathways.** The verified metabolites were used for pathway enrichment using MetaboAnalyst 5.0.

| Pathway Name                                    | Total | Hits | Expect | P value | Holm P | FDR    |
|-------------------------------------------------|-------|------|--------|---------|--------|--------|
| Aminoacyl-tRNA biosynthesis                     | 48    | 10   | 2.59   | 1.45E-4 | 0.0122 | 0.0122 |
| Biosynthesis of unsaturated fatty acids         | 36    | 8    | 1.94   | 4.44E-4 | 0.0368 | 0.0186 |
| Starch and sucrose metabolism                   | 18    | 4    | 0.97   | 0.0134  | 1.0    | 0.311  |
| Glutathione metabolism                          | 28    | 5    | 1.51   | 0.0148  | 1.0    | 0.311  |
| Glycine, serine and threonine metabolism        | 33    | 5    | 1.78   | 0.029   | 1.0    | 0.405  |
| Cysteine and methionine metabolism              | 33    | 5    | 1.78   | 0.029   | 1.0    | 0.405  |
| D-Glutamine and D-glutamate metabolism          | 6     | 2    | 0.323  | 0.0373  | 1.0    | 0.448  |
| Galactose metabolism                            | 27    | 4    | 1.45   | 0.0533  | 1.0    | 0.523  |
| Purine metabolism                               | 65    | 7    | 3.5    | 0.056   | 1.0    | 0.523  |
| Valine, leucine and isoleucine biosynthesis     | 8     | 2    | 0.431  | 0.065   | 1.0    | 0.546  |
| Neomycin, kanamycin and gentamicin biosynthesis | 2     | 1    | 0.108  | 0.105   | 1.0    | 0.801  |
| Arginine and proline metabolism                 | 38    | 4    | 2.05   | 0.144   | 1.0    | 0.984  |
| Alpha-Linolenic acid metabolism                 | 13    | 2    | 0.7    | 0.152   | 1.0    | 0.984  |

**Table S6. Raw data of correlations between differential metabolites and gene expressions.** The spearman

bivariate correlate analysis was performed through SPSS version 20, *p*-values less than 0.05 were identified as significant.

| <b>Metabolites</b>                      | <b>Gene</b> | <b><i>r</i>-value</b> | <b><i>p</i>-value</b> | <b>Realation</b> |
|-----------------------------------------|-------------|-----------------------|-----------------------|------------------|
| Suberic acid                            | sod-3       | 0.654                 | 0.001                 | positive         |
| Tetracosanoic acid                      | sod-3       | 0.546                 | 0.007                 | positive         |
| Behenic acid                            | sod-3       | 0.553                 | 0.006                 | positive         |
| Heneicosanoic acid                      | sod-3       | 0.514                 | 0.012                 | negative         |
| Hexadecane                              | sod-3       | 0.501                 | 0.015                 | negative         |
| Heptadecanoic acid                      | sod-3       | 0.594                 | 0.003                 | negative         |
| Oleamide                                | sod-3       | 0.657                 | 0.001                 | negative         |
| Oleic Acid                              | sod-3       | 0.51                  | 0.013                 | negative         |
| Linoleic acid                           | sod-3       | 0.605                 | 0.003                 | positive         |
| Eicosadienoic acid                      | sod-3       | 0.699                 | 0                     | positive         |
| L-Isoleucine                            | sod-3       | 0.591                 | 0.003                 | negative         |
| L-Threonine                             | sod-3       | 0.47                  | 0.024                 | negative         |
| L-Proline                               | sod-3       | 0.524                 | 0.01                  | negative         |
| L-Tyrosine                              | sod-3       | 0.48                  | 0.02                  | negative         |
| L-Serine                                | sod-3       | 0.423                 | 0.044                 | positive         |
| Glutathione                             | sod-3       | 0.509                 | 0.013                 | positive         |
| Ophthalmate                             | sod-3       | 0.521                 | 0.011                 | negative         |
| L-Ornithine monochlorohydrate/ornithine | sod-3       | 0.498                 | 0.016                 | positive         |
| Guanosine                               | sod-3       | 0.441                 | 0.035                 | positive         |
| N-Dodecane                              | sod-3       | 0.456                 | 0.029                 | positive         |
| Urea                                    | sod-3       | 0.461                 | 0.027                 | positive         |
| Phosphoribosyl formamidocarboxamide     | sod-3       | 0.491                 | 0.017                 | negative         |
| LysoSM(d18:1)                           | sod-3       | 0.465                 | 0.025                 | negative         |
| Gluconic acid                           | sod-3       | 0.733                 | 0                     | negative         |
| Trehalose                               | sod-3       | 0.458                 | 0.028                 | positive         |
| Syringin                                | sod-3       | 0.432                 | 0.039                 | positive         |
| Myo-Inositol                            | sod-3       | 0.431                 | 0.04                  | negative         |
| D-Fructose                              | sod-3       | 0.421                 | 0.045                 | positive         |
| Beta-D-Glucose                          | sod-3       | 0.65                  | 0.001                 | negative         |
| Tetracosanoic acid                      | nhr-80      | 0.426                 | 0.048                 | positive         |
| Heneicosanoic acid                      | nhr-80      | 0.581                 | 0.005                 | negative         |
| Hexadecane                              | nhr-80      | 0.811                 | 0                     | negative         |
| Palmitoleic acid                        | nhr-80      | 0.442                 | 0.039                 | negative         |
| Heptadecanoic acid                      | nhr-80      | 0.507                 | 0.016                 | negative         |
| Myristic acid                           | nhr-80      | 0.598                 | 0.003                 | positive         |

|                                         |          |       |       |          |
|-----------------------------------------|----------|-------|-------|----------|
| alpha-Linolenic acid                    | nhr-80   | 0.453 | 0.034 | positive |
| L-Lysine                                | nhr-80   | 0.505 | 0.017 | negative |
| L-Isoleucine                            | nhr-80   | 0.642 | 0.642 | negative |
| L-Proline                               | nhr-80   | 0.528 | 0.012 | negative |
| Glutathione                             | nhr-80   | 0.598 | 0.003 | positive |
| Putrescine                              | nhr-80   | 0.467 | 0.028 | negative |
| Inosinic acid                           | nhr-80   | 0.424 | 0.049 | negative |
| Phosphoribosyl formamidocarboxamide     | nhr-80   | 0.496 | 0.019 | negative |
| LysoSM(d18:1)                           | nhr-80   | 0.474 | 0.026 | negative |
| Gluconic acid                           | nhr-80   | 0.506 | 0.016 | negative |
| Beta-D-Glucose                          | nhr-80   | 0.586 | 0.042 | negative |
| Galactosylsphingosine                   | nhr-80   | 0.438 | 0.042 | negative |
| L-Palmitoylcarnitine                    | hsp-16.2 | 0.495 | 0.027 | negative |
| Palmitic Acid                           | hsp-16.2 | 0.453 | 0.045 | negative |
| Suberic acid                            | hsp-16.2 | 0.503 | 0.024 | positive |
| Heptadecanoic acid                      | hsp-16.2 | 0.518 | 0.019 | negative |
| Myristic acid                           | hsp-16.2 | 0.519 | 0.019 | positive |
| L-Isoleucine                            | hsp-16.2 | 0.592 | 0.006 | negative |
| L-Proline                               | hsp-16.2 | 0.658 | 0.002 | negative |
| L-Tyrosine                              | hsp-16.2 | 0.564 | 0.01  | negative |
| Ophthalmate                             | hsp-16.2 | 0.515 | 0.02  | negative |
| dGDP                                    | hsp-16.2 | 0.514 | 0.02  | negative |
| Phosphoribosyl formamidocarboxamide     | hsp-16.2 | 0.679 | 0.001 | negative |
| Uridine 5'-diphosphate                  | hsp-16.2 | 0.571 | 0.008 | negative |
| Gluconic acid                           | hsp-16.2 | 0.704 | 0.001 | negative |
| Beta-D-Glucose                          | hsp-16.2 | 0.477 | 0.033 | negative |
| L-Palmitoylcarnitine                    | hsf-1    | 0.517 | 0.02  | negative |
| Suberic acid                            | hsf-1    | 0.751 | 0     | positive |
| Heneicosanoic acid                      | hsf-1    | 0.627 | 0.003 | negative |
| Heptadecanoic acid                      | hsf-1    | 0.517 | 0.02  | negative |
| Oleamide                                | hsf-1    | 0.58  | 0.007 | negative |
| Myristic acid                           | hsf-1    | 0.519 | 0.019 | positive |
| alpha-Linolenic acid                    | hsf-1    | 0.802 | 0     | positive |
| L-Isoleucine                            | hsf-1    | 0.691 | 0.001 | negative |
| L-Proline                               | hsf-1    | 0.591 | 0.001 | negative |
| L-Tyrosine                              | hsf-1    | 0.57  | 0.009 | negative |
| Glutathione                             | hsf-1    | 0.531 | 0.016 | positive |
| Ophthalmate                             | hsf-1    | 0.594 | 0.006 | negative |
| DL-O-Phosphoserine                      | hsf-1    | 0.486 | 0.03  | negative |
| L-Ornithine monochlorohydrate/ornithine | hsf-1    | 0.555 | 0.011 | positive |
| Guanosine                               | hsf-1    | 0.629 | 0.003 | positive |
| N-Dodecane                              | hsf-1    | 0.463 | 0.04  | positive |
| Urea                                    | hsf-1    | 0.513 | 0.021 | positive |
| dGDP                                    | hsf-1    | 0.534 | 0.015 | negative |

|                                         |       |       |       |          |
|-----------------------------------------|-------|-------|-------|----------|
| Phosphoribosyl formamidocarboxamide     | hsf-1 | 0.636 | 0.003 | negative |
| Gluconic acid                           | hsf-1 | 0.774 | 0     | negative |
| Beta-D-Glucose                          | hsf-1 | 0.485 | 0.03  | negative |
| Galactosylsphingosine                   | hsf-1 | 0.523 | 0.018 | negative |
| Suberic acid                            | fat-7 | 0.545 | 0.011 | positive |
| alpha-Linolenic acid                    | fat-7 | 0.561 | 0.008 | positive |
| L-Isoleucine                            | fat-7 | 0.54  | 0.012 | negative |
| Ophthalmate                             | fat-7 | 0.439 | 0.046 | negative |
| L-Ornithine monochlorohydrate/ornithine | fat-7 | 0.507 | 0.019 | positive |
| Urea                                    | fat-7 | 0.512 | 0.018 | positive |
| Phosphoribosyl formamidocarboxamide     | fat-7 | 0.686 | 0.001 | negative |
| Uridine 5'-diphosphate                  | fat-7 | 0.591 | 0.005 | negative |
| Uridine 5'-monophosphate                | fat-7 | 0.462 | 0.035 | negative |
| Gluconic acid                           | fat-7 | 0.512 | 0.018 | negative |
| Suberic acid                            | fat-6 | 0.465 | 0.025 | positive |
| Hexadecane                              | fat-6 | 0.643 | 0.001 | negative |
| Heptadecanoic acid                      | fat-6 | 0.557 | 0.006 | negative |
| Myristic acid                           | fat-6 | 0.445 | 0.033 | positive |
| Eicosadienoic acid                      | fat-6 | 0.613 | 0.002 | positive |
| L-Isoleucine                            | fat-6 | 0.579 | 0.004 | negative |
| L-Proline                               | fat-6 | 0.437 | 0.037 | negative |
| L-Tyrosine                              | fat-6 | 0.434 | 0.039 | negative |
| Glycine                                 | fat-6 | 0.423 | 0.044 | positive |
| Glutathione                             | fat-6 | 0.481 | 0.02  | positive |
| Ophthalmate                             | fat-6 | 0.485 | 0.019 | negative |
| L-Ornithine monochlorohydrate/ornithine | fat-6 | 0.454 | 0.03  | positive |
| N-Dodecane                              | fat-6 | 0.514 | 0.012 | positive |
| Phosphoribosyl formamidocarboxamide     | fat-6 | 0.679 | 0     | negative |
| Uridine 5'-diphosphate                  | fat-6 | 0.477 | 0.021 | negative |
| Gluconic acid                           | fat-6 | 0.648 | 0.001 | negative |
| Beta-D-Glucose                          | fat-6 | 0.557 | 0.006 | negative |
| Suberic acid                            | fat-5 | 0.632 | 0.001 | positive |
| Tetracosanoic acid                      | fat-5 | 0.729 | 0     | positive |
| Pyroglutamic acid                       | fat-5 | 0.392 | 0.048 | positive |
| Succinic acid                           | fat-5 | 0.398 | 0.044 | positive |
| Behenic acid                            | fat-5 | 0.682 | 0     | positive |
| Heneicosanoic acid                      | fat-5 | 0.848 | 0     | negative |
| Hexadecane                              | fat-5 | 0.601 | 0.001 | negative |
| Palmitoleic acid                        | fat-5 | 0.635 | 0     | negative |
| Heptadecanoic acid                      | fat-5 | 0.59  | 0.001 | negative |
| Oleamide                                | fat-5 | 0.761 | 0     | negative |
| Oleic Acid                              | fat-5 | 0.625 | 0.001 | negative |
| Linoleic acid                           | fat-5 | 0.589 | 0.002 | positive |
| Eicosapentaenoic Acid                   | fat-5 | 0.487 | 0.012 | positive |

|                                         |       |       |       |          |
|-----------------------------------------|-------|-------|-------|----------|
| Myristic acid                           | fat-5 | 0.5   | 0.009 | positive |
| Hexadecanal                             | fat-5 | 0.517 | 0.007 | positive |
| alpha-Linolenic acid                    | fat-5 | 0.759 | 0     | positive |
| Eicosadienoic acid                      | fat-5 | 0.657 | 0     | positive |
| Vaccenic acid                           | fat-5 | 0.528 | 0.006 | positive |
| beta-Alanine                            | fat-5 | 0.421 | 0.032 | positive |
| L-Lysine                                | fat-5 | 0.527 | 0.006 | negative |
| L-Isoleucine                            | fat-5 | 0.67  | 0     | negative |
| L-Threonine                             | fat-5 | 0.484 | 0.012 | negative |
| L-Proline                               | fat-5 | 0.658 | 0     | negative |
| L-Tryptophan                            | fat-5 | 0.422 | 0.032 | positive |
| L-Serine                                | fat-5 | 0.522 | 0.006 | positive |
| S-Adenosylmethionine                    | fat-5 | 0.443 | 0.024 | positive |
| Glycine                                 | fat-5 | 0.461 | 0.018 | positive |
| Glutathione                             | fat-5 | 0.575 | 0.002 | positive |
| Ophthalmate                             | fat-5 | 0.581 | 0.002 | negative |
| L-Cystathionine                         | fat-5 | 0.491 | 0.011 | negative |
| Putrescine                              | fat-5 | 0.575 | 0.002 | negative |
| L-Ornithine monochlorohydrate/ornithine | fat-5 | 0.479 | 0.013 | positive |
| Guanosine                               | fat-5 | 0.541 | 0.004 | positive |
| N-Dodecane                              | fat-5 | 0.666 | 0     | positive |
| Urea                                    | fat-5 | 0.555 | 0.003 | positive |
| Inosinic acid                           | fat-5 | 0.428 | 0.029 | negative |
| Phosphoribosyl formamidocarboxamide     | fat-5 | 0.479 | 0.013 | negative |
| Uridine 5'-monophosphate                | fat-5 | 0.476 | 0.014 | negative |
| LysoSM(d18:1)                           | fat-5 | 0.607 | 0.001 | negative |
| Gluconic acid                           | fat-5 | 0.607 | 0.001 | negative |
| Trehalose                               | fat-5 | 0.703 | 0     | positive |
| D-Glucose                               | fat-5 | 0.459 | 0.018 | positive |
| Isomaltose                              | fat-5 | 0.513 | 0.007 | positive |
| Beta-D-Fructose 3-phosphate             | fat-5 | 0.499 | 0.009 | positive |
| Syringin                                | fat-5 | 0.479 | 0.013 | positive |
| D-Mannose                               | fat-5 | 0.637 | 0     | positive |
| Myo-Inositol                            | fat-5 | 0.666 | 0     | negative |
| D-Fructose                              | fat-5 | 0.448 | 0.022 | positive |
| Beta-D-Glucose                          | fat-5 | 0.646 | 0     | negative |
| Galactosylsphingosine                   | fat-5 | 0.634 | 0.001 | negative |
| Suberic acid                            | daf-2 | 0.468 | 0.032 | negative |
| Tetracosanoic acid                      | daf-2 | 0.648 | 0.001 | negative |
| Pyroglutamic acid                       | daf-2 | 0.501 | 0.021 | negative |
| Behenic acid                            | daf-2 | 0.63  | 0.002 | negative |
| Heneicosanoic acid                      | daf-2 | 0.794 | 0     | positive |
| Palmitoleic acid                        | daf-2 | 0.623 | 0.003 | positive |
| Heptadecanoic acid                      | daf-2 | 0.441 | 0.046 | positive |

|                                         |        |       |       |          |
|-----------------------------------------|--------|-------|-------|----------|
| Oleamide                                | daf-2  | 0.771 | 0     | positive |
| Oleic Acid                              | daf-2  | 0.454 | 0.039 | positive |
| Hexadecanal                             | daf-2  | 0.573 | 0.007 | negative |
| alpha-Linolenic acid                    | daf-2  | 0.691 | 0.001 | negative |
| Eicosadienoic acid                      | daf-2  | 0.612 | 0.003 | negative |
| Vaccenic acid                           | daf-2  | 0.621 | 0.003 | negative |
| L-Lysine                                | daf-2  | 0.592 | 0.005 | positive |
| L-Isoleucine                            | daf-2  | 0.563 | 0.008 | positive |
| L-Proline                               | daf-2  | 0.634 | 0.002 | positive |
| S-Adenosylmethionine                    | daf-2  | 0.442 | 0.045 | negative |
| Ophthalmate                             | daf-2  | 0.578 | 0.006 | positive |
| L-Cystathionine                         | daf-2  | 0.669 | 0.001 | positive |
| Putrescine                              | daf-2  | 0.642 | 0.002 | positive |
| N-Dodecane                              | daf-2  | 0.491 | 0.024 | negative |
| Urea                                    | daf-2  | 0.629 | 0.002 | negative |
| Uridine 5'-monophosphate                | daf-2  | 0.558 | 0.009 | positive |
| LysoSM(d18:1)                           | daf-2  | 0.548 | 0.01  | positive |
| Gluconic acid                           | daf-2  | 0.437 | 0.048 | positive |
| Trehalose                               | daf-2  | 0.48  | 0.028 | negative |
| D-Glucose                               | daf-2  | 0.483 | 0.026 | negative |
| Isomaltose                              | daf-2  | 0.486 | 0.025 | negative |
| Beta-D-Fructose 2-phosphate             | daf-2  | 0.581 | 0.006 | negative |
| D-Mannose                               | daf-2  | 0.562 | 0.008 | negative |
| Myo-Inositol                            | daf-2  | 0.579 | 0.006 | positive |
| D-Fructose                              | daf-2  | 0.467 | 0.033 | negative |
| Beta-D-Glucose                          | daf-2  | 0.449 | 0.041 | positive |
| Galactosylsphingosine                   | daf-2  | 0.613 | 0.003 | positive |
| Heptadecanoic acid                      | daf-16 | 0.456 | 0.033 | negative |
| Myristic acid                           | daf-16 | 0.463 | 0.03  | positive |
| L-Methionine                            | daf-16 | 0.44  | 0.04  | negative |
| L-Isoleucine                            | daf-16 | 0.624 | 0.002 | negative |
| L-Glutamate                             | daf-16 | 0.44  | 0.04  | negative |
| L-Tyrosine                              | daf-16 | 0.59  | 0.004 | negative |
| DL-O-Phosphoserine                      | daf-16 | 0.479 | 0.024 | negative |
| L-Ornithine monochlorohydrate/ornithine | daf-16 | 0.432 | 0.045 | positive |
| Phosphoribosyl formamidocarboxamide     | daf-16 | 0.666 | 0.001 | negative |
| Uridine 5'-diphosphate                  | daf-16 | 0.691 | 0     | negative |
| Gluconic acid                           | daf-16 | 0.542 | 0.009 | negative |
| L-Palmitoylcarnitine                    | akt-1  | 0.606 | 0.004 | positive |
| Heneicosanoic acid                      | akt-1  | 0.535 | 0.012 | positive |
| Hexadecane                              | akt-1  | 0.595 | 0.004 | positive |
| alpha-Linolenic acid                    | akt-1  | 0.473 | 0.03  | negative |
| L-Lysine                                | akt-1  | 0.57  | 0.007 | positive |
| L-Isoleucine                            | akt-1  | 0.521 | 0.015 | positive |



---

|                                     |       |       |       |          |
|-------------------------------------|-------|-------|-------|----------|
| L-Proline                           | akt-1 | 0.507 | 0.019 | positive |
| Putrescine                          | akt-1 | 0.468 | 0.032 | positive |
| dGDP                                | akt-1 | 0.606 | 0.004 | positive |
| Phosphoribosyl formamidocarboxamide | akt-1 | 0.451 | 0.04  | positive |

---
